1 **Lifelong impacts of puberty timing on human plasma metabolic**  
2 **profiles**

3 **Zengjun Li, MB<sup>1</sup>; Si Fang, MS<sup>2,3</sup>; Dong Liu, MPH<sup>4</sup>; Fei Li\*, MD<sup>4,5,6</sup>, Cairong**  
4 **Zhu\*, PhD<sup>1</sup>; Jian Zhao\*, PhD<sup>4,6</sup>**

5 **Affiliations:**

6 1. Department of Epidemiology and Biostatistics, West China School of Public Health  
7 and West China Fourth Hospital, Sichuan University, 610041, China.

8 2. Population Health Sciences, Bristol Medical School, University of Bristol, Bristol,  
9 United Kingdom.

10 3. Medical Research Council (MRC) Integrative Epidemiology Unit (IEU), University  
11 of Bristol, Bristol, United Kingdom.

12 4. Ministry of Education and Shanghai Key Laboratory of Children's Environmental  
13 Health, Xinhua Hospital, Shanghai Jiao Tong University School of Medicine,  
14 Shanghai, 200092, China

15 5. Department of Developmental and Behavioral Pediatric & Child Primary Care,  
16 Brain and Behavioral Research Unit of Shanghai Institute for Pediatric Research,  
17 Xinhua Hospital, Shanghai Jiao Tong University School of Medicine, Shanghai,  
18 China

19 6. Department of Maternal and Child Health, School of Public Health, Shanghai Jiao  
20 Tong University, 200092, China.

**NOTE: This preprint reports new research that has not been certified by peer review and should not be used to guide clinical practice.**

21 **\*Corresponding author:**

22 Dr Jian Zhao, Ministry of Education and Shanghai Key Laboratory of Children's  
23 Environmental Health, Xinhua Hospital, Shanghai Jiao Tong University School of  
24 Medicine, Shanghai, 200092, China (jzhao.epi@gmail.com).

25 Dr Cairong Zhu, Department of Epidemiology and Biostatistics, West China School  
26 of Public Health and West China Fourth Hospital, Sichuan University, 610041, China  
27 (cairong.zhu@hotmail.com).

28 Dr Fei Li, Department of Developmental and Behavioral Pediatric & Child Primary  
29 Care, Brain and Behavioral Research Unit of Shanghai Institute for Pediatric Research,  
30 Xinhua Hospital, Shanghai Jiao Tong University School of Medicine, Shanghai,  
31 200092, China (feili@shsmu.edu.cn).

32

### 33 **Abstract**

34 There has been uncertainty regarding the long-term impact of puberty timing on  
35 human plasma metabolites. This lack of clarity can be attributed to the influence of  
36 confounding factors present in conventional observational studies. To determine the  
37 causal effect of puberty timing on plasma metabolites, we employed a two-sample  
38 Mendelian randomization (MR) analysis, complemented by MR mediation analysis  
39 assessing the direct effect. We utilized data from a large-scale meta-analysis of  
40 genome-wide association studies (GWAS) on puberty timing, consisting of 329,345  
41 women of European ancestry, and a meta-analysis of GWAS on plasma metabolites,  
42 involving up to 86,507 individuals. Our findings provide moderate evidence  
43 supporting a causal effect of puberty timing on 23 out of 174 plasma metabolites.  
44 After excluding 7 single nucleotide polymorphisms (SNPs) related to birth weight and  
45 childhood adiposity, causal effects remained for 16 metabolites. Through two-step  
46 MR analysis, we observed strong evidence that adulthood adiposity mediated the  
47 causal relationships of puberty timing on 35 plasma metabolites. We also observed  
48 moderate evidence for an independent causal effect of puberty timing on 10  
49 metabolites through multivariable MR analysis. We further used metabolomic data  
50 measured in the UK Biobank (UKB) to perform a replication analysis to validate the  
51 causal effect estimated. Nine amino acids were identified in the UKB, and the  
52 replication analysis supported our main findings.

### 53 **Introduction**

54 The onset of puberty, influenced by a combination of genetic and environmental  
55 factors <sup>1,2</sup>, plays a pivotal role in shaping growth and development throughout an  
56 individual's lifespan <sup>3</sup>. Early puberty onset has been associated with various

57 unfavorable health outcomes, including childhood and adulthood obesity <sup>4,5</sup>, type 2  
58 diabetes <sup>6</sup>, hypertension <sup>7</sup>, breast cancer <sup>8</sup>, and mental disorders <sup>9</sup>. The hormonal  
59 fluctuations during puberty initiation trigger metabolic changes that can have  
60 significant implications <sup>3</sup>. The investigation of the causal relationship between puberty  
61 timing and plasma metabolites in adulthood is of utmost importance, given the  
62 increasing recognition of plasma metabolites as effective biomarkers for illness  
63 diagnosis and prognosis <sup>10,11</sup>. This exploration will provide insights into the long-  
64 lasting effects of early-life determinants, such as puberty onset, on human metabolism  
65 later in life. Unfortunately, previous studies on this subject have been limited,  
66 predominantly relying on conventional multivariable analysis methods that are  
67 susceptible to confounding or reverse causation biases <sup>5,12,13</sup>. Additionally, the  
68 utilization of longitudinal studies for the examination of the correlation between  
69 puberty timing and the concentration of plasma metabolites necessitates an extended  
70 duration of follow-up, resulting in limited empirical support.

71 Mendelian randomization (MR) is an increasingly used study design that employs  
72 genetic variants as instrumental variables to draw causal inferences between an  
73 exposure of interest (e.g., puberty timing) and an outcome (e.g., a metabolite) <sup>14</sup>. MR  
74 analyses are much less vulnerable to conventional confounding as a result of the  
75 random assignment of alleles during meiosis <sup>15</sup>, hence differentiating MR from normal  
76 observational research. Moreover, MR analyses are less prone to reverse causation  
77 because the assortment of alleles precedes the initiation of exposure (e.g., puberty  
78 timing).

79 A recent MR study investigated if puberty timing has a distinct influence on adulthood  
80 cardiometabolic traits <sup>16</sup>. The results suggested that the effects of puberty timing on

81 adulthood adiposity and cardiometabolic traits are not likely driven by itself but by  
82 childhood adiposity. Additionally, it is worth noting that the majority of the  
83 cardiometabolic characteristics examined in this study mostly focused on lipids,  
84 resulting in a very restricted range of metabolites investigated. Consequently, in this  
85 study, we aimed to examine whether puberty timing is likely to, directly and/or  
86 indirectly, impact a wide range of plasma metabolites, including amino acids,  
87 biogenic amines, acylcarnitines, phosphatidylcholines, lysophosphatidylcholines,  
88 sphingomyelins, and hexose in adulthood in a two-sample MR framework. Along with  
89 conducting univariable MR analysis to infer the total effect of puberty timing on  
90 plasma metabolites, we also performed MR mediation analysis to take the mediating  
91 effect of adulthood adiposity into account.

## 92 **Results**

### 93 **Lifelong causal effects of puberty timing on human metabolites**

94 The study design is illustrated in **Fig 1**. In the primary analysis, all genetically  
95 significant SNPs were used as instrument variables. Additionally, to minimize the bias  
96 arising from horizontal pleiotropy, a secondary analysis was also performed by  
97 excluding SNPs that were genetically associated with confounders (e.g., birth weight  
98 and childhood adiposity) (**Fig 2**). Two-sample MR analysis suggested moderate  
99 causal associations between genetically predicted puberty timing and 23 plasma  
100 metabolites within the subclasses including acylcarnitines, amino acids, biogenic  
101 amines, and lysophosphatidylcholines based on the primary analysis (i.e., inverse-  
102 variance weighted (IVW) analysis) results (**Fig 3-4; Table S7**) with *P* values ranging  
103 from  $9.09 \times 10^{-4}$  to  $4.92 \times 10^{-2}$ . The MR analysis results supported positive causal  
104 associations of later puberty timing with higher levels of 20 metabolites. The strongest

105 causal evidence was found for dodecanedioylcarnitine (beta = 0.11, 95% CI: 0.04 to  
106 0.17,  $P = 9.09 \times 10^{-4}$ ), which means each year delayed puberty onset was associated  
107 with 0.11 standard deviation (SD) units higher of dodecanedioylcarnitine. By contrast,  
108 lower levels of three amino acids, aspartate (beta = -0.04, 95% CI:  $-7.19 \times 10^{-2}$  to -  
109  $6.40 \times 10^{-4}$ ,  $P = 4.60 \times 10^{-2}$ ), phenylalanine (beta = -0.03, 95% CI:  $-5.03 \times 10^{-2}$  to -  
110  $1.20 \times 10^{-3}$ ,  $P = 3.98 \times 10^{-2}$ ), and tyrosine (beta = -0.03, 95% CI:  $-5.17 \times 10^{-2}$  to -8.46  
111  $\times 10^{-3}$ ,  $P = 6.41 \times 10^{-3}$ ), were observed per one year later onset of puberty.

112 For the 23 metabolites indicating moderate causal consequences of puberty timing,  
113 causal effect estimates in sensitivity analyses were broadly consistent with the results  
114 of the primary IVW analysis (**Table S8-S9**). Of note, intercept terms estimated in the  
115 MR-Egger regression analysis suggested that some of the results might be biased by  
116 horizontal pleiotropy including aspartate, phenylalanine, alpha-aminoadipic acid,  
117 lysoPC a C16:0, PC aa C38:0 and PC aa C40:1, which was also supported by  
118 evidence of heterogeneity tested via Cochran's Q statistic in the IVW analysis (**Table**  
119 **S10-S11**).

120 After excluding 7 SNPs associated with birth weight and childhood body mass index  
121 (BMI), the secondary IVW analysis confirmed moderate evidence for causal  
122 associations of later puberty timing with higher levels of 16 metabolites out of the  
123 aforementioned 23 metabolites in the primary two-sample MR analysis. It is  
124 noteworthy that 3 additional metabolites, including dodecenoylcarnitine: beta = 0.06,  
125 95% CI:  $2.75 \times 10^{-3}$  to  $1.10 \times 10^{-2}$ ,  $P = 3.94 \times 10^{-2}$ ; tryptophan: beta = 0.04, 95% CI:  
126  $5.61 \times 10^{-3}$  to  $8.25 \times 10^{-2}$ ,  $P = 2.47 \times 10^{-2}$ ; and kynurenine: beta = 0.06, 95% CI:  $1.57$   
127  $\times 10^{-2}$  to  $9.58 \times 10^{-2}$ ,  $P = 6.38 \times 10^{-3}$ , appeared to be impacted by puberty timing in  
128 the secondary IVW analysis, after controlling for potentially horizontal pleiotropic

129 effects via birth weight or childhood adiposity. On the contrary, 10 out of the 23  
130 putative metabolites observed in the primary analysis turned to statistically non-  
131 significant in the secondary IVW analysis (**Fig 4, Table S12**), which included  
132 phenylalanine, threonine, asparagine, aspartate, tyrosine, trans-hydroxyproline,  
133 lysoPC a C17:0, lysoPC a C18:0, lysoPC a C18:1, and lysoPC a C18:2. Among them,  
134 intercept terms estimated in the MR-Egger regression analysis suggested possible  
135 horizontal pleiotropy for phenylalanine and heterogeneity for aspartate and lysoPC a  
136 C18:1 (**Table S13-S14**).

### 137 **Mediation analysis**

138 The estimated causal effects of adulthood BMI on 174 metabolites suggested that  
139 adulthood BMI strongly influenced plasma concentrations of some metabolites  
140 through two-step MR analysis, including 35 metabolites reaching nominal  
141 significance and 13 reaching statistical significance after the multiple testing  
142 Bonferroni correction (**Table S15**). Further, we found a causal effect of puberty  
143 timing (beta = -0.13, 95% CI: -0.17 to -0.09,  $P = 8.71 \times 10^{-12}$ ) on the mediator (i.e.,  
144 adulthood BMI). By exploiting the "product of coefficients" method, we derived the  
145 indirect effects of puberty timing on each plasma metabolite (**Table S15**). For  
146 instance, we found that each year of delayed puberty onset was associated with 0.01  
147 SD units increase in serine through the pathway of adulthood adiposity (beta = 0.01,  
148 95% CI:  $1.04 \times 10^{-3}$  to  $2.44 \times 10^{-2}$ ,  $P = 0.03$ ), indicating that adulthood adiposity was  
149 a putative factor that mediated the causal relationships of puberty timing on certain  
150 metabolites. To further rule out the influence of horizontal pleiotropy, we removed a  
151 total of 13 SNPs highly related to childhood adiposity and birth weight from  
152 adulthood BMI and puberty timing genetic instrument sets. A total of 31 metabolites

153 reached nominal significance and 8 reached the multiple testing Bonferroni corrected  
154 significance level. Moreover, the effect size of puberty timing on adulthood adiposity  
155 attenuated from  $-0.13 \text{ kg/m}^2$  to  $-0.09 \text{ kg/m}^2$  (beta=  $-0.09$ , 95% CI:  $-0.11$  to  $-0.06$ ,  $P =$   
156  $1.81 \times 10^{-8}$ ). Nevertheless, the mediating role of adulthood BMI between puberty  
157 timing and adulthood metabolites persisted when the potential pleiotropic effects were  
158 adjusted for (**Table S17**).

159 The MVMR analysis results supported causal evidence for direct causal effects of  
160 puberty timing on 10 metabolites (i.e., carnitine, dodecanedioylcarnitine,  
161 hydroxytetradecenoylcarnitine, tiglylcarnitine, lysine, ornithine, cis-hydroxyproline,  
162 trans-hydroxyproline, lysoPC a C20:4, and PC aa C40:4) based on nominal  
163 significance threshold of  $P < 0.05$ . Moreover, among the 10 significant metabolites,  
164 the results suggested that carnitine, dodecanedioylcarnitine, tiglylcarnitine  
165 (acylcarnitines), lysine (amino acids), and lysoPC a C20:4 (lysophosphatidylcholines)  
166 were directly affected by puberty timing and had the same direction as results in the  
167 primary analysis (**Fig 5; Table S16**). Notably, the effect sizes attenuated to varying  
168 degrees, because adulthood BMI was adjusted for in the MVMR analysis. For  
169 example, the coefficient for dodecanedioylcarnitine attenuated from 0.11 SD units to  
170 0.07 SD units per year later onset of puberty, approximately half of the original  
171 estimate. Compared with the results in the primary MR analysis, except for  
172 phenylalanine and tyrosine (amino acids) which showed inconsistent directions, the  
173 remaining 21 metabolites showed the same direction as the primary two-sample MR  
174 analysis. Furthermore, the MVMR analysis suggested that the plasma levels of 17  
175 metabolites (i.e., hydroxyhexadecenoylcarnitine, nonacylcarnitine, valerylcarnitine,  
176 asparagine, aspartate, methionine, phenylalanine, serine, threonine, tyrosine, sarcosine,  
177 trans-hydroxyproline, lysoPC a C16:0, lysoPC a C17:0, lysoPC a C18:0, lysoPC a



178 C18:1, lysoPC a C18:2) were mediated by adulthood BMI rather than directly affected  
179 by puberty timing (**Table S16; Table S18**).

## 180 **Replication analysis**

181 We attempted to replicate the effect estimates for puberty timing on the identified nine  
182 metabolites in the UKB. In the two-sample MR analysis, a nominally significant  
183 causal relationship was revealed between puberty timing and two amino acids, namely  
184 phenylalanine (beta = -0.03, 95% CI:  $-5.38 \times 10^{-2}$  to  $-2.45 \times 10^{-3}$ ,  $P = 3.18 \times 10^{-2}$ ) and  
185 valine (beta = -0.04, 95% CI:  $-6.54 \times 10^{-2}$  to  $-3.82 \times 10^{-3}$ ,  $P = 2.77 \times 10^{-2}$ , although  
186 none of the nine amino acids reached the strictly adjusted  $P$  threshold of  $5.56 \times 10^{-3}$   
187 (0.05/9) (**Fig 6; Table S19**). Causal effect estimates in the replication analysis of the  
188 UKB data were consistent with those estimated in the primary two-sample MR  
189 analysis except for isoleucine and glutamine. Notably, consistent with the primary  
190 MVMR analysis results, in the MVMR analysis using the UKB data, the causal  
191 effects attenuated towards null after adjusting for adulthood adiposity, suggesting little  
192 direct effects were observed between puberty timing and the nine amino acids (**Fig 6;**  
193 **Table S20**).

## 194 **Discussion**

195 Plasma levels of metabolites have been investigated as promising biomarkers for  
196 disease risk stratification and critical molecular targets for developing novel  
197 treatments and interventions for a range of diseases and conditions<sup>17-20</sup>. Given that  
198 puberty timing is consistently associated with the risk of developing various chronic  
199 diseases in adulthood<sup>21</sup>, further causal insights into the relationship between puberty  
200 timing and plasma levels of metabolites will help understand underlying biological

201 mechanisms and identify possible putative target biomarkers for disease treatment or  
202 intervention. Here, we systematically and extensively investigated the lifelong  
203 impacts of puberty timing on human plasma metabolic profiles, by integrating data on  
204 human puberty timing and plasma metabolism in the MR causal inference framework.  
205 Genetically predicted puberty timing appeared to have causal effects on 23 plasma  
206 metabolites in adulthood. After considering the potential mediating role of adulthood  
207 adiposity, direct causal effects of puberty timing on 10 adulthood metabolites  
208 remained, suggesting the causal effects of puberty timing on certain metabolites in  
209 adulthood were mediated by adulthood adiposity. Our findings in the primary MR  
210 analysis were further supported by the results from the mediation analysis and  
211 external replication analysis in the UKB.

212 Among the 23 plasma metabolites identified in the two-sample MR analysis, seven  
213 belong to acylcarnitines. In MVMR analysis, 5 of the 10 metabolites affected by  
214 puberty timing were also confirmed within the subclass of acylcarnitines, including  
215 carnitine, tiglylcarnitine (short-chain), dodecanedioylcarnitine,  
216 hydroxytetradecenoylcarnitine, and octadecenoylcarnitine (medium- and long-chain).  
217 With the causal effect estimates ranging from 0.05 SD to 0.07 SD per year of delayed  
218 puberty onset, our findings suggested that certain acylcarnitine metabolites were  
219 directly and independently impacted by puberty timing. Acylcarnitines were a group  
220 of compounds formed from carnitine and acyl-CoAs in mitochondria or peroxisomal  
221 by carnitine acyltransferases<sup>22,23</sup>, which can cross mitochondrial and cell membranes.  
222 Short-chain acylcarnitines are generated from the degradation of glucose, amino acids,  
223 and fatty acids. Medium- and long-chain acylcarnitines are largely produced from  
224 fatty acids participating in the transportation of fatty acids for the following fatty acids  
225 oxidation<sup>24</sup>. It has been well understood that increased plasma levels of acylcarnitine

226 are associated with a higher risk of cardiovascular disease<sup>25-27</sup>. The underlying  
227 mechanism might be the accumulation of acylcarnitine was associated with a  
228 disturbed  $\beta$ -oxidation rate and mitochondrial dysfunction<sup>28,29</sup>. In addition, previous  
229 studies have shown that a shorter reproductive lifespan is associated with an increased  
230 risk of cardiovascular disease events<sup>30</sup>. Furthermore, in our study, we found a positive  
231 causal effect of delayed puberty timing on the accumulation of acylcarnitine. Taking  
232 together, our findings may shed new light on the correlation between puberty timing  
233 and cardiovascular diseases. However, whether puberty timing affects cardiovascular  
234 diseases through the acylcarnitine metabolism pathway has not been illuminated, thus  
235 more studies are warranted.

236 Of note, we found 8 amino acids in adulthood were significantly impacted by puberty  
237 timing in the primary MR analysis, among which inverse causal effects of puberty  
238 timing on the concentrations of tyrosine and phenylalanine were externally validated  
239 using data from the UKB. After accounting for adulthood adiposity in the MVMR  
240 analysis, the direct causal effects of puberty timing on these 8 amino acids attenuated  
241 to null in both the primary and replication MVMR analysis. It suggests a mediating  
242 role of adulthood adiposity in the causal pathway from puberty timing to the  
243 aforementioned amino acids. Our findings were partly consistent with the findings  
244 from a previous study<sup>16</sup>, where an inverse association between age at menarche and  
245 phenylalanine measured at 18 years old was revealed in the conventional  
246 observational analysis among the females in the Avon Longitudinal Study of Parents  
247 and Children (ALSPAC), but a causal association was failed to be established in the  
248 one-sample MR analysis using the same ALSPAC cohort data.

249 In our two-step MR analysis, we found that adulthood BMI influenced the levels of 35  
250 metabolites, and adulthood BMI itself was also influenced by puberty timing. After  
251 adjusting for adulthood BMI through MVMR analysis, the number of metabolites  
252 influenced by puberty timing decreased from 23 to 10. Our findings suggested that  
253 adulthood BMI may serve as a mediator between puberty timing and plasma  
254 metabolites. The reason lies in the fact that early-maturing individuals may face a  
255 higher risk of obesity and exhibit a higher likelihood of metabolic abnormalities in  
256 adulthood<sup>31</sup>. Obesity can also significantly increase the risk of developing metabolic  
257 disorders by affecting energy metabolism and altering pathways<sup>32</sup>, which could be the  
258 reason for changes in acylcarnitine and amino acid metabolism.

259 The strengths of this study were as follows. First, the data we used were curated from  
260 the latest and largest GWAS in European ancestry. Second, the MR mediation analysis  
261 makes it possible to infer the direct and indirect effects of genetically predicted  
262 puberty timing on adulthood plasma levels of metabolites. In the two-step MR  
263 analysis, we used adulthood BMI as a mediator to investigate the indirect effects of  
264 puberty timing on metabolites. As for MVMR analysis, we included both adulthood  
265 BMI and puberty timing as exposures to explore the direct effect of puberty timing on  
266 metabolites. Third, to minimize the risk of bias due to horizontal pleiotropy, we  
267 excluded SNPs that had genome-wide significant associations with birth weight or  
268 childhood obesity. Finally, external replication analysis using data from the UKB  
269 supported our primary analysis results, suggesting the robustness of our findings.

270 Limitations were also noted. First, our study results were primarily based on GWAS  
271 conducted in individuals of European descent. Consequently, it should be cautious  
272 when generalizing the results to non-European populations. Second, despite extensive

273 analyses were performed to minimize the risk of bias due to horizontal pleiotropy, it  
274 cannot be fully ruled out, thus the results should be interpreted with caution. Third,  
275 the puberty timing GWAS were conducted in females exclusively, while the  
276 metabolites GWAS included female and male individuals. As there may be sex-  
277 specific effects on the levels of metabolites<sup>33</sup>, this could potentially impact our causal  
278 effect estimates. Thus, future studies taking into account the sex-specific effects with  
279 regard to the relationship between puberty timing and human plasma metabolism are  
280 warranted.

281 In summary, we explored the causal relationship of puberty timing with human  
282 plasma metabolite levels using publicly available GWAS summary data. We found a  
283 causal effect of puberty timing on 23 plasma metabolites through two-sample MR  
284 analysis, and most of the effects were mediated by adulthood adiposity. The findings  
285 provide novel insights into the causal inferences of puberty timing on human  
286 metabolism. Additionally, the role of adulthood adiposity in mediating the causal  
287 relationship between puberty timing and plasma metabolites is identified.

## 288 **Material and Methods**

### 289 **Data sources**

290 The information on all GWAS data used in the analyses is shown in **Table S21**.  
291 Summary statistics on age at menarche (AAM) (measured in years) were obtained  
292 from the largest meta-analysis of GWASs, including 329,345 women of European  
293 ancestry from 42 cohort studies<sup>34</sup>. A total of 389 SNPs reaching genome-wide  
294 significance ( $P < 5 \times 10^{-8}$ ) were identified. There exists a genetic correlation ( $r_g=0.74$ )  
295 between the AAM of females and the age at voice breaking of males, which suggests

296 that many genetic variants have comparable effects on puberty timing in both males  
297 and females. Consequently, there was credibility that genetic variants of AAM can  
298 provide confident insights into puberty timing in males as well <sup>35</sup>. Thus, in our study,  
299 these genetic variants were considered instrumental variables for puberty timing. We  
300 also refer to AAM as puberty timing in the present study.

301 A total of 174 plasma metabolites in seven biochemical categories (i.e., amino acids,  
302 biogenic amines, acylcarnitines, phosphatidylcholines, lysophosphatidylcholines,  
303 sphingomyelins, and hexoses), from the largest GWAS of human plasma metabolites,  
304 were used as the outcomes in this study <sup>36</sup>. Summary statistics on all metabolites  
305 measured by high-throughput platforms were obtained from the cross-platform meta-  
306 analysis GWAS of blood metabolites, which included several cohorts with sample  
307 sizes for each metabolite ranging from 8,569 to 86,507 individuals of European  
308 ancestry. The GWASs were undertaken in cohorts of Fenland study (N = 9,363),  
309 EPIC-Norfolk (European Prospective Investigation into Cancer-Norfolk) (N = 5,841),  
310 and INTERVAL study (Metabolon Discovery HD4 platform, N = 8,455 and <sup>1</sup>H  
311 nuclear magnetic resonance (NMR), Nightingale, N = 40,905). The results were  
312 further meta-analyzed with two published studies conducted by Kettunen et al. (N =  
313 24,925) and Shin et al. (N = 7,824) <sup>37,38</sup>.

314 The adulthood adiposity GWAS conducted by the Genetic Investigation of  
315 Anthropomorphic Traits (GIANT) consortium included 315,347 adults of European  
316 ancestry, combining data from the Research Program on Genes, Environment, and  
317 Health (RPGEH), Genetic Epidemiology Research on Aging (GERA) cohort and a  
318 meta-analysis of GWASs conducted by Locke et al. <sup>39,40</sup>. A total of 147 genome-wide

319 significant variants associated with adulthood BMI were selected as genetic  
320 instruments in the MR mediation analysis.

321 Since birth weight and childhood adiposity have been reported to be associated with  
322 puberty timing and plasma metabolite level changes in previous studies <sup>41-43</sup>, we  
323 excluded SNPs, which were genetically significantly associated with these two traits,  
324 from the genetic instruments for puberty timing to minimize the potential risk of bias  
325 due to horizontal pleiotropy. Full summary data on birth weight and childhood BMI  
326 were obtained from the Early Growth Genetics (EGG) Consortium <sup>43,44</sup>. In the birth  
327 weight GWAS, Warrington et al. conducted a meta-analysis of the fetal genetic effects  
328 in up to 297,356 Europeans with their own birth weight and 210,248 Europeans with  
329 offspring birth weight <sup>43</sup>. Bradfield et al. performed a trans-ancestral GWAS meta-  
330 analysis of childhood BMI from 30 studies, but only data on Europeans were used in  
331 the analyses <sup>44</sup>.

332 We then attempted to replicate the findings of our study by using data from  
333 independent GWASs. Data on puberty timing were obtained from a GWAS conducted  
334 on up to 182,416 females of European descent from 58 studies <sup>45</sup>. Summary statistics  
335 on adulthood BMI were obtained from a meta-analysis of 322,154 European  
336 ancestries from the GIANT consortium <sup>40</sup>. Furthermore, we obtained summary  
337 statistics from a GWAS of metabolites measured in the UKB, which were conducted  
338 on over 114,000 individuals of European ancestry <sup>46</sup>.

### 339 **Genetic instruments selection**

340 To ensure statistical independence between genetic instruments, we performed a  
341 stringent linkage disequilibrium (LD) clumping (window = 10 MB and  $r^2 < 0.001$  in

342 PLINK 1.9) using the European ancestry data set of the 1000 Genomes Project as a  
343 reference panel and selected all the bi-allelic SNPs with minor allele frequency  
344 (MAF) > 0.01 using the clump data function in the TwoSample MR R package <sup>47</sup>.  
345 After LD clumping, 208 and 147 SNPs were selected as genetic instruments for  
346 puberty timing and adulthood BMI, respectively. Of note, when a SNP instrumenting  
347 for the exposure of interest was not available in the outcome summary data, a proxy  
348 variant in high-LD with the SNP (window = 1MB and  $r^2 > 0.80$  in European ancestry)  
349 was looked up using the online platform LDlink (<https://ldlink.nci.nih.gov/>). SNPs  
350 would be removed from the sets of genetic instruments if no available proxies can be  
351 identified. As no qualified alternative proxy variants were found in each step, the  
352 analyses did not use any proxy SNPs. Detailed information on IVs for puberty timing  
353 and adulthood BMI is presented in **Table S1-S6**.

## 354 **Statistical analysis**

### 355 **Two-sample MR analysis**

356 As shown in **Fig 1**, a two-sample MR analysis was used as the primary analysis  
357 approach to examine the causal effects of genetically predicted puberty timing on 174  
358 human plasma metabolites. The IVW method, which assumes no correlations or  
359 interactions between genetic instruments and generates average causal effect estimates  
360 across multiple instruments, was used in the primary MR analysis <sup>48</sup>. The causal effect  
361 estimates were interpreted as standardized mean differences in concentrations of  
362 metabolites per year delayed onset of puberty. Heterogeneity between causal effect  
363 estimates for each SNP was examined by calculating Cochran's Q statistic, which  
364 indicated potentially horizontal pleiotropy.



## 365 **MR mediation analysis**

366 To investigate the extent, to which adulthood adiposity might mediate the causal  
367 relationship between puberty timing and metabolite levels, we performed an MR  
368 mediation analysis (**Fig 1-2**). The indirect causal effects of puberty timing on plasma  
369 metabolite levels were estimated using the two-step MR method <sup>49</sup>. In the first step,  
370 we tested the causal effects of adulthood BMI on all plasma metabolite levels. In the  
371 second step, we tested the causal effect of puberty timing on adulthood BMI. Then we  
372 used the “product of coefficients” approach <sup>50</sup> to calculate the indirect causal effects of  
373 puberty timing on each blood metabolite via adulthood BMI. The standard error of  
374 each indirect causal effect was estimated by using the “multivariate delta method” <sup>51</sup>.

375 Compared with conventional univariable two-sample MR, which estimates the total  
376 effect of one exposure on the outcome, MVMR includes multiple risk factors as  
377 exposures to estimate the direct causal effect on the outcome after adjusting for other  
378 risk factors <sup>52</sup>. We accomplished MVMR analysis to assess the direct causal effects of  
379 both puberty timing and adulthood BMI on 174 plasma metabolites. Since only  
380 participants involved in the ReproGen consortium were available in the full summary  
381 statistics of puberty timing GWAS <sup>34</sup>, a total of 207 IVs for puberty timing used in the  
382 MVMR were directly selected from the summary data following the same LD  
383 clumping strategy.

## 384 **Sensitivity analysis**

385 To assess the robustness of our results in the two-sample MR analysis, we also  
386 performed four other sensitivity analyses. MR-Egger regression provides an unbiased  
387 estimate of the causal effect even if all SNPs used as instrumental variables are invalid

388 <sup>53</sup>. The weighted median model requires that at least 50% of the SNPs were valid  
389 genetic instruments to provide unbiased estimates of causal effects in MR analyses <sup>54</sup>.  
390 The weighted mode method provides consistent causal effect estimates even if the  
391 majority of SNPs were invalid <sup>55</sup>. The Mendelian Randomization Pleiotropy RESidual  
392 Sum and Outlier (MR-PRESSO) method detects outlying genetic variants that might  
393 lead to horizontal pleiotropy and further provides causal effect estimates after  
394 removing outliers <sup>56</sup>. Horizontal pleiotropy was tested via the intercept terms in the  
395 MR-Egger regression analysis.

396 As birth weight and childhood obesity were investigated as common causes of  
397 puberty timing and some of the adulthood metabolite levels <sup>57</sup>, to minimize the risk of  
398 violating one of the MR core assumptions (i.e., exclusion restriction assumption) <sup>58</sup>,  
399 we excluded SNPs that were genetically significantly associated with birth weight or  
400 childhood BMI ( $P < 5 \times 10^{-8}$ ) from genetic instruments. Based on this, a secondary  
401 IVW analysis was performed with the reduced genetic instrument sets.

#### 402 **Replication analysis in the UK Biobank**

403 The UKB, a population-based cohort, has recruited approximately 500,000  
404 individuals aged 40 to 69 years across the UK. By utilizing the targeted high-  
405 throughput nuclear magnetic resonance (NMR) metabolomics platform (Nightingale  
406 Health Ltd; biomarker quantification version 2020), 249 metabolic measures (i.e., 165  
407 metabolic measures and 84 derived ratios) were quantified simultaneously <sup>46</sup>.  
408 However, given that only nine of the metabolites (i.e., alanine, glutamine, glycine,  
409 histidine, isoleucine, leucine, phenylalanine, tyrosine, and valine) measured in the  
410 UKB were identified to coincide with the metabolites included in the primary analysis,  
411 we merely estimated the relationship between puberty timing and the nine amino

412 acids to inspect the robustness of our primary analysis results. Firstly, we conducted a  
413 two-sample MR analysis to investigate the total effect of puberty timing on each  
414 amino acid. Subsequently, we also performed MVMR analysis to obtain the direct  
415 impact of puberty timing on amino acids after adjusting for adulthood adiposity. Of 68  
416 SNPs identified as associated with puberty timing, 60 were eventually used in two-  
417 sample MR, and the 8 SNPs were removed due to being palindromic with  
418 intermediate allele frequencies. A total of 55 SNPs were employed in MVMR analysis  
419 after LD clumping.

#### 420 **Multiple testing correction**

421 Given that a large number of tests were performed, a conservative Bonferroni  
422 multiple-test correction was applied. The  $P$  value threshold for statistical significance  
423 becomes  $P < 4.90 \times 10^{-4}$  (0.05/102) after correcting for 102 tests corresponding to the  
424 number of principal components explained 95% of the variance of the 174 metabolites  
425 in the GWAS by Lotta et al.<sup>59</sup>, which indicated strong causal evidence for our results.  
426 Meanwhile, the conventional  $P$  value threshold of 0.05 was also reported to avoid  
427 ignoring potentially crucial findings after constructing a “suggestive significance  
428 threshold”<sup>60,61</sup>, which offered moderate causal evidence.

429 All statistical analyses were performed using R version 4.1.2, in which the  
430 TwoSampleMR (version 0.5.6) and MRPRESSO (version 1.0) packages were used  
431 <sup>47,56</sup>. The ggplot2 and circlize R packages were used to visualize statistical analysis  
432 results <sup>62,63</sup>.

#### 433 **Data availability**

434 The genetic instruments for puberty timing were obtained from the corresponding  
435 literature at [https://reprogen.org/data\\_download.html](https://reprogen.org/data_download.html). Data on plasma metabolites  
436 GWAS can be found at [www.omicscience.org](http://www.omicscience.org). Full summary data on adulthood BMI  
437 were obtained from the MRC Integrative Epidemiology Unit OpenGWAS project  
438 (<https://gwas.mrcieu.ac.uk/>). Full summary data on birth weight and childhood BMI  
439 were obtained from the Early Growth Genetics Consortium ([egg-consortium.org](http://egg-consortium.org)). The  
440 replication analyses were conducted using data from the UKB  
441 (<https://www.ukbiobank.ac.uk/>) and the summary level data were obtained at  
442 <https://gwas.mrcieu.ac.uk/>.

#### 443 **Code availability**

444 Scripts are available on GitHub at [https://github.com/ZengjunLi/Puberty\\_metabolites](https://github.com/ZengjunLi/Puberty_metabolites).

#### 445 **References**

- 446 1. Toppari, J. & Juul, A. Trends in puberty timing in humans and environmental modifiers.  
447 *Molecular and Cellular Endocrinology* **324**, 39-44 (2010).
- 448 2. Day, F.R., Perry, J.R.B. & Ong, K.K. Genetic Regulation of Puberty Timing in Humans.  
449 *Neuroendocrinology* **102**, 247-255 (2015).
- 450 3. Pinyerd, B. & Zipf, W.B. Puberty—Timing Is Everything! *Journal of Pediatric Nursing* **20**,  
451 75-82 (2005).
- 452 4. Li, W. *et al.* Association between Obesity and Puberty Timing: A Systematic Review and  
453 Meta-Analysis. in *International Journal of Environmental Research and Public Health* Vol. 14  
454 (2017).
- 455 5. Prentice, P. & Viner, R.M. Pubertal timing and adult obesity and cardiometabolic risk in  
456 women and men: a systematic review and meta-analysis. *International Journal of Obesity* **37**,  
457 1036-1043 (2013).
- 458 6. Cheng, T.S., Day, F.R., Lakshman, R. & Ong, K.K. Association of puberty timing with type 2

- 459 diabetes: a systematic review and meta-analysis. *PLoS medicine* **17**, e1003017 (2020).
- 460 7. Hulanicka, B., Lipowicz, A., Koziel, S. & Kowalisko, A. Relationship between early puberty  
461 and the risk of hypertension/overweight at age 50: Evidence for a modified Barker hypothesis  
462 among Polish youth. *Economics & Human Biology* **5**, 48-60 (2007).
- 463 8. Biro, F.M., Huang, B., Wasserman, H., Gordon, C.M. & Pinney, S.M. Pubertal Growth, IGF-1,  
464 and Windows of Susceptibility: Puberty and Future Breast Cancer Risk. *Journal of Adolescent*  
465 *Health* **68**, 517-522 (2021).
- 466 9. Galvao, T.F. *et al.* Pubertal timing in girls and depression: A systematic review. *Journal of*  
467 *Affective Disorders* **155**, 13-19 (2014).
- 468 10. Park, J., Shin, Y., Kim, T.H., Kim, D.-H. & Lee, A. Plasma metabolites as possible biomarkers  
469 for diagnosis of breast cancer. *PLoS One* **14**, e0225129 (2019).
- 470 11. Zhao, Y., Lv, H., Qiu, S., Gao, L. & Ai, H. Plasma metabolic profiling and novel metabolite  
471 biomarkers for diagnosing prostate cancer. *RSC advances* **7**, 30060-30069 (2017).
- 472 12. Heys, M. *et al.* Age of Menarche and the Metabolic Syndrome in China. *Epidemiology*  
473 **18**(2007).
- 474 13. Feng, Y. *et al.* Effects of age at menarche, reproductive years, and menopause on metabolic  
475 risk factors for cardiovascular diseases. *Atherosclerosis* **196**, 590-7 (2008).
- 476 14. Davey Smith, G. & Ebrahim, S. 'Mendelian randomization': can genetic epidemiology  
477 contribute to understanding environmental determinants of disease?\*. *International Journal of*  
478 *Epidemiology* **32**, 1-22 (2003).
- 479 15. Lawlor, D.A., Harbord, R.M., Sterne, J.A.C., Timpson, N. & Davey Smith, G. Mendelian  
480 randomization: Using genes as instruments for making causal inferences in epidemiology.  
481 *Statistics in Medicine* **27**, 1133-1163 (2008).
- 482 16. Bell, J. *et al.* Influence of puberty timing on adiposity and cardiometabolic traits: A Mendelian  
483 randomisation study. *PLOS Medicine* **15**, e1002641 (2018).
- 484 17. Yuan, B. *et al.* A plasma metabolite panel as biomarkers for early primary breast cancer  
485 detection. *International Journal of Cancer* **144**, 2833-2842 (2019).
- 486 18. Knific, T. *et al.* Models including plasma levels of sphingomyelins and phosphatidylcholines  
487 as diagnostic and prognostic biomarkers of endometrial cancer. *The Journal of Steroid*  
488 *Biochemistry and Molecular Biology* **178**, 312-321 (2018).

- 489 19. Li, S., Gao, D. & Jiang, Y. Function, Detection and Alteration of Acylcarnitine Metabolism in  
490 Hepatocellular Carcinoma. *Metabolites* **9**(2019).
- 491 20. Takaya, H. *et al.* Acylcarnitine: Useful biomarker for early diagnosis of hepatocellular  
492 carcinoma in non-steatohepatitis patients. *World J Gastrointest Oncol* **11**, 887-897 (2019).
- 493 21. Day, F.R., Elks, C.E., Murray, A., Ong, K.K. & Perry, J.R. Puberty timing associated with  
494 diabetes, cardiovascular disease and also diverse health outcomes in men and women: the UK  
495 Biobank study. *Sci Rep* **5**, 11208 (2015).
- 496 22. Kerner, J. & Hoppel, C. Fatty acid import into mitochondria. *Biochimica et Biophysica Acta*  
497 (*BBA*) - *Molecular and Cell Biology of Lipids* **1486**, 1-17 (2000).
- 498 23. Violante, S. *et al.* Peroxisomes contribute to the acylcarnitine production when the carnitine  
499 shuttle is deficient. *Biochimica et Biophysica Acta (BBA) - Molecular and Cell Biology of*  
500 *Lipids* **1831**, 1467-1474 (2013).
- 501 24. Meierhofer, D. Acylcarnitine profiling by low-resolution LC-MS. *PLoS One* **14**, e0221342  
502 (2019).
- 503 25. Guasch-Ferré, M. *et al.* Plasma acylcarnitines and risk of cardiovascular disease: effect of  
504 Mediterranean diet interventions. *Am J Clin Nutr* **103**, 1408-16 (2016).
- 505 26. Kaul, P. *et al.* Incidence of heart failure and mortality after acute coronary syndromes. *Am*  
506 *Heart J* **165**, 379-85.e2 (2013).
- 507 27. Kalim, S. *et al.* A plasma long-chain acylcarnitine predicts cardiovascular mortality in incident  
508 dialysis patients. *J Am Heart Assoc* **2**, e000542 (2013).
- 509 28. Nicholas, D.A. *et al.* Fatty Acid Metabolites Combine with Reduced  $\beta$  Oxidation to Activate  
510 Th17 Inflammation in Human Type 2 Diabetes. *Cell Metab* **30**, 447-461.e5 (2019).
- 511 29. Jarrell, Z.R. *et al.* Plasma acylcarnitine levels increase with healthy aging. *Aging (Albany NY)*  
512 **12**, 13555-13570 (2020).
- 513 30. Mishra, S.R., Chung, H.F., Waller, M. & Mishra, G.D. Duration of estrogen exposure during  
514 reproductive years, age at menarche and age at menopause, and risk of cardiovascular disease  
515 events, all-cause and cardiovascular mortality: a systematic review and meta-analysis. *BJOG:*  
516 *An International Journal of Obstetrics & Gynaecology* **128**, 809-821 (2021).
- 517 31. Richardson, T.G., Sanderson, E., Elsworth, B., Tilling, K. & Davey Smith, G. Use of genetic  
518 variation to separate the effects of early and later life adiposity on disease risk: mendelian

- 519 randomisation study. *Bmj* **369**, m1203 (2020).
- 520 32. Zhou, Y. *et al.* Obesity and diabetes related plasma amino acid alterations. *Clinical*  
521 *Biochemistry* **46**, 1447-1452 (2013).
- 522 33. Verri Hernandez, V. *et al.* Age, Sex, Body Mass Index, Diet and Menopause Related  
523 Metabolites in a Large Homogeneous Alpine Cohort. *Metabolites* **12**(2022).
- 524 34. Day, F.R. *et al.* Genomic analyses identify hundreds of variants associated with age at  
525 menarche and support a role for puberty timing in cancer risk. *Nat Genet* **49**, 834-841 (2017).
- 526 35. Day, F.R. *et al.* Shared genetic aetiology of puberty timing between sexes and with health-  
527 related outcomes. *Nature Communications* **6**, 8842 (2015).
- 528 36. Lotta, L.A. *et al.* A cross-platform approach identifies genetic regulators of human metabolism  
529 and health. *Nat Genet* **53**, 54-64 (2021).
- 530 37. Kettunen, J. *et al.* Genome-wide study for circulating metabolites identifies 62 loci and reveals  
531 novel systemic effects of LPA. *Nat Commun* **7**, 11122 (2016).
- 532 38. Shin, S.Y. *et al.* An atlas of genetic influences on human blood metabolites. *Nat Genet* **46**,  
533 543-550 (2014).
- 534 39. Hoffmann, T.J. *et al.* A Large Multiethnic Genome-Wide Association Study of Adult Body  
535 Mass Index Identifies Novel Loci. *Genetics* **210**, 499-515 (2018).
- 536 40. Locke, A.E. *et al.* Genetic studies of body mass index yield new insights for obesity biology.  
537 *Nature* **518**, 197-206 (2015).
- 538 41. Wang, Y., Dinse, G.E. & Rogan, W.J. Birth weight, early weight gain and pubertal maturation:  
539 a longitudinal study. *Pediatr Obes* **7**, 101-9 (2012).
- 540 42. Bull, C.J. *et al.* Adiposity, metabolites, and colorectal cancer risk: Mendelian randomization  
541 study. *BMC Med* **18**, 396 (2020).
- 542 43. Warrington, N.M. *et al.* Maternal and fetal genetic effects on birth weight and their relevance  
543 to cardio-metabolic risk factors. *Nat Genet* **51**, 804-814 (2019).
- 544 44. Bradfield, J.P. *et al.* A trans-ancestral meta-analysis of genome-wide association studies  
545 reveals loci associated with childhood obesity. *Hum Mol Genet* **28**, 3327-3338 (2019).
- 546 45. Perry, J.R. *et al.* Parent-of-origin-specific allelic associations among 106 genomic loci for age  
547 at menarche. *Nature* **514**, 92-97 (2014).
- 548 46. Borges, M.C. *et al.* Role of circulating polyunsaturated fatty acids on cardiovascular diseases

- 549 risk: analysis using Mendelian randomization and fatty acid genetic association data from over  
550 114,000 UK Biobank participants. *BMC Med* **20**, 210 (2022).
- 551 47. Hemani, G. *et al.* The MR-Base platform supports systematic causal inference across the  
552 human phenome. *Elife* **7**(2018).
- 553 48. Burgess, S., Butterworth, A. & Thompson, S.G. Mendelian randomization analysis with  
554 multiple genetic variants using summarized data. *Genet Epidemiol* **37**, 658-65 (2013).
- 555 49. Relton, C.L. & Davey Smith, G. Two-step epigenetic Mendelian randomization: a strategy for  
556 establishing the causal role of epigenetic processes in pathways to disease. *Int J Epidemiol* **41**,  
557 161-76 (2012).
- 558 50. VanderWeele, T.J. Mediation Analysis: A Practitioner's Guide. *Annu Rev Public Health* **37**, 17-  
559 32 (2016).
- 560 51. MacKinnon, D.P., Fairchild, A.J. & Fritz, M.S. Mediation analysis. *Annu Rev Psychol* **58**, 593-  
561 614 (2007).
- 562 52. Sanderson, E., Davey Smith, G., Windmeijer, F. & Bowden, J. An examination of  
563 multivariable Mendelian randomization in the single-sample and two-sample summary data  
564 settings. *Int J Epidemiol* **48**, 713-727 (2019).
- 565 53. Bowden, J. *et al.* Assessing the suitability of summary data for two-sample Mendelian  
566 randomization analyses using MR-Egger regression: the role of the I<sup>2</sup> statistic. *Int J Epidemiol*  
567 **45**, 1961-1974 (2016).
- 568 54. Bowden, J., Davey Smith, G., Haycock, P.C. & Burgess, S. Consistent Estimation in  
569 Mendelian Randomization with Some Invalid Instruments Using a Weighted Median  
570 Estimator. *Genet Epidemiol* **40**, 304-14 (2016).
- 571 55. Hartwig, F.P., Davey Smith, G. & Bowden, J. Robust inference in summary data Mendelian  
572 randomization via the zero modal pleiotropy assumption. *International Journal of*  
573 *Epidemiology* **46**, 1985-1998 (2017).
- 574 56. Verbanck, M., Chen, C.-Y., Neale, B. & Do, R. Detection of widespread horizontal pleiotropy  
575 in causal relationships inferred from Mendelian randomization between complex traits and  
576 diseases. *Nature Genetics* **50**, 693-698 (2018).
- 577 57. Bell, J.A. *et al.* Influence of puberty timing on adiposity and cardiometabolic traits: A  
578 Mendelian randomisation study. *PLoS Med* **15**, e1002641 (2018).



- 579 58. Boef, A.G.C., Dekkers, O.M. & le Cessie, S. Mendelian randomization studies: a review of the  
580 approaches used and the quality of reporting. *International Journal of Epidemiology* **44**, 496-  
581 511 (2015).
- 582 59. Lotta, L.A. *et al.* A cross-platform approach identifies genetic regulators of human metabolism  
583 and health. *Nat Genet* **53**, 54-64 (2021).
- 584 60. Sterne, J.A.C. & Smith, G.D. Sifting the evidence—what's wrong with significance tests?  
585 *Physical Therapy* **81**, 1464-1469 (2001).
- 586 61. Amrhein, V., Greenland, S. & McShane, B. Scientists rise up against statistical significance.  
587 (Nature Publishing Group, 2019).
- 588 62. Wickham, H. *Ggplot2: Elegant Graphics for Data Analysis*, (ggplot2: Elegant Graphics for  
589 Data Analysis, 2009).
- 590 63. Gu, Z., Gu, L., Eils, R., Schlesner, M. & Brors, B. circlize Implements and enhances circular  
591 visualization in R. *Bioinformatics* **30**, 2811-2 (2014).

592

## 593 **Acknowledgements**

594 This study was supported by grants from the National Natural Science Foundation of  
595 China (82373588, 82125032, 81930095 and 81761128035), Xinhua Hospital,  
596 Shanghai Jiao Tong University School of Medicine, Shanghai, China (2021YJRC02),  
597 Innovative research team of high-level local universities in Shanghai (SHSMU-  
598 ZDCX20211100), the Science and Technology Commission of Shanghai Municipality  
599 (19410713500 and 2018SHZDZX01), the Shanghai Municipal Commission of Health  
600 and Family Planning (GWV-10.1-XK07, 2020CXJQ01, 2018YJRC03) and Sichuan  
601 Science and Technology Program (2021JDR0189). The funders of the study had no  
602 role in the study design, data collection, data analysis, or data interpretation; writing  
603 or reviewing of the manuscript; and decision to submit the manuscript for publication.

## 604 **Author information**

### 605 **Authors and Affiliations**

606 1. Department of Epidemiology and Biostatistics, West China School of Public Health  
607 and West China Fourth Hospital, Sichuan University, 610041, China.

608 Zengjun Li & Cairong Zhu\*

609 2. Population Health Sciences, Bristol Medical School, University of Bristol, Bristol,  
610 United Kingdom.

611 Si Fang

612 3. Medical Research Council (MRC) Integrative Epidemiology Unit (IEU), University  
613 of Bristol, Bristol, United Kingdom.

614 Si Fang

615 4. Ministry of Education and Shanghai Key Laboratory of Children's Environmental  
616 Health, Xinhua Hospital, Shanghai Jiao Tong University School of Medicine,  
617 Shanghai, 200092, China

618 Dong Liu, Fei Li\* & Jian Zhao\*

619 5. Department of Developmental and Behavioral Pediatric & Child Primary Care,  
620 Brain and Behavioral Research Unit of Shanghai Institute for Pediatric Research,  
621 Xinhua Hospital, Shanghai Jiao Tong University School of Medicine, Shanghai,  
622 China

623 Fei Li\*

624 6. Department of Maternal and Child Health, School of Public Health, Shanghai Jiao  
625 Tong University, 200092, China.

626 Fei Li\* & Jian Zhao\*

## 627 **Contributions**

628 Cairong Zhu, Fei Li, and Jian Zhao initially conceived the study design. Zengjun Li  
629 and Si Fang carried out statistical analyses, and Zengjun Li wrote the first draft of the  
630 manuscript with input from Cairong Zhu, Fei Li, and Jian Zhao. Zengjun Li and Dong  
631 Liu plotted the figures. All authors contributed to the interpretation of the results and  
632 critical revision of the manuscript.

## 633 **Corresponding author**

634 Correspondence to Jian Zhao, Cairong Zhu, and Fei Li.

635

636 **Ethical approval**

637 This study used publicly available GWAS summary data and was not subject to

638 institutional review board approval.

639 **Competing interests**

640 The authors declare no competing interests.

641 **Supplementary information**

642 Table S1-S21.

643

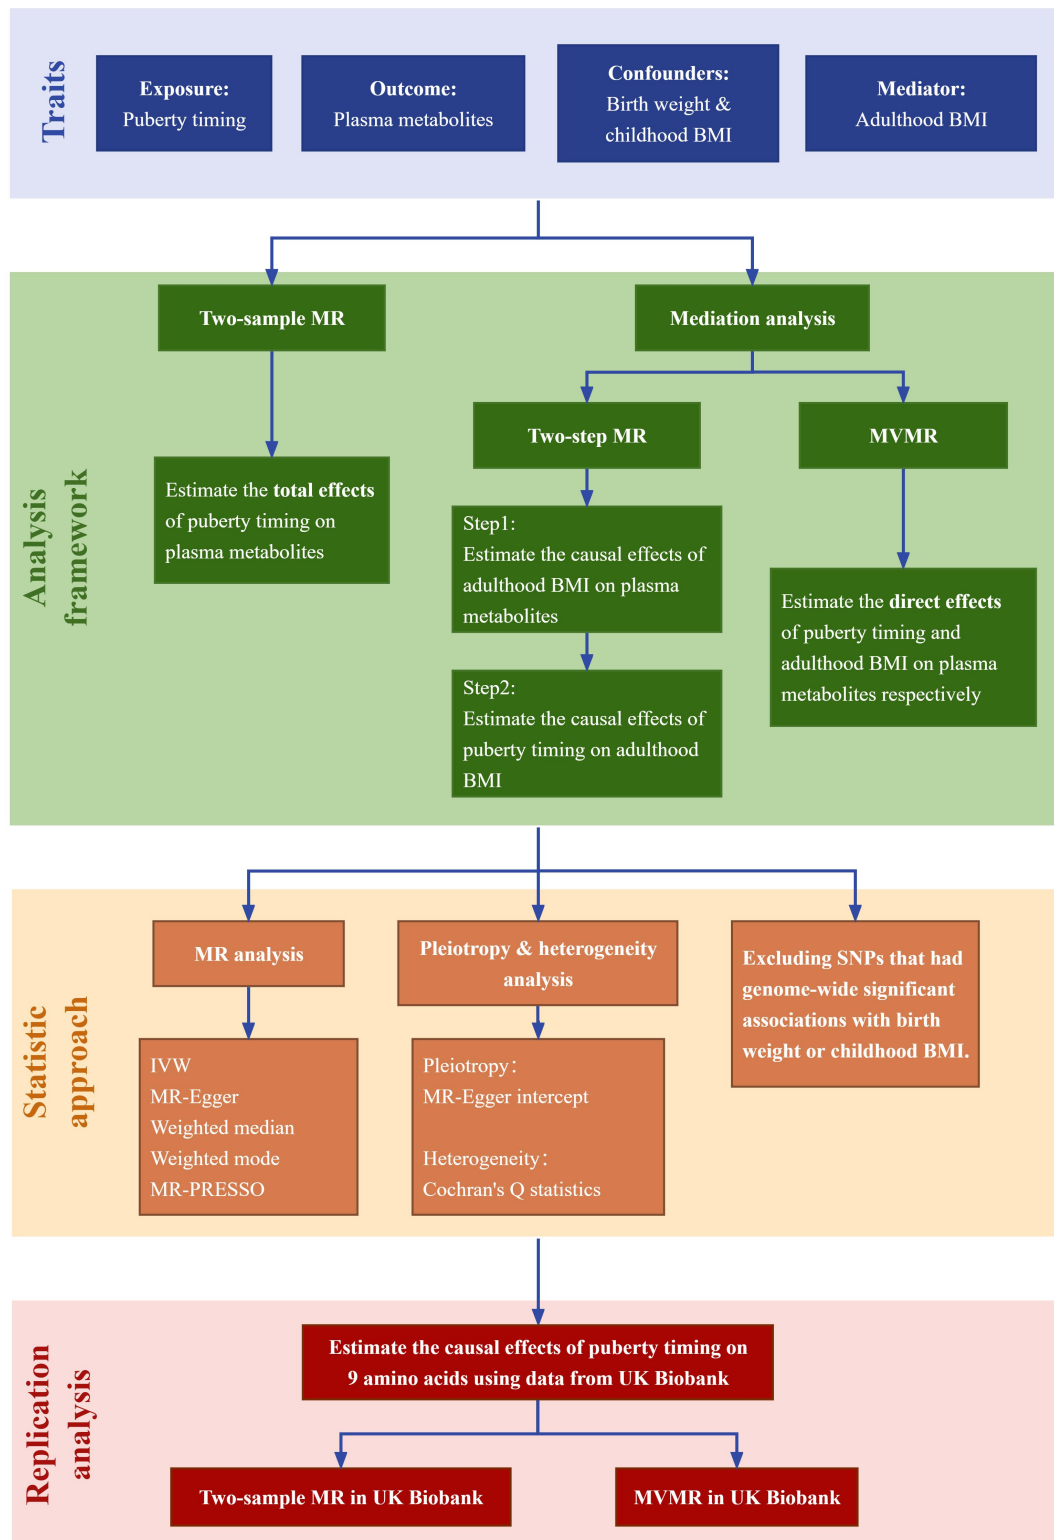

644

645 **Fig 1. The schematic diagram for Mendelian randomization of puberty timing on**  
 646 **plasma metabolites. The primary analysis was conducted utilizing a two-sample MR**

647 (Mendelian randomization) approach to investigate the total effect of puberty timing  
648 on plasma metabolites. In addition, we employed the two-step MR and MVMR  
649 (multivariable Mendelian randomization) approach, taking the mediating effect of  
650 adulthood BMI (body mass index) into account to infer the “direct” and “indirect”  
651 effects. The IVW (inverse-variance weighted) approach was used as the primary  
652 analysis, while MR-Egger, weighted median, weighted mode, and MR-PRESSO  
653 (Mendelian randomization pleiotropy residual sum and outlier) were used as  
654 sensitivity analyses. Subsequently, we excluded SNPs (single nucleotide  
655 polymorphisms) that were genetically associated with birth weight and/or childhood  
656 BMI from genetic instruments to minimize the risk of bias due to horizontal  
657 pleiotropy. We further used metabolomic data obtained from the UK Biobank to  
658 perform a replication analysis, aiming to validate the causal effect estimated.

659

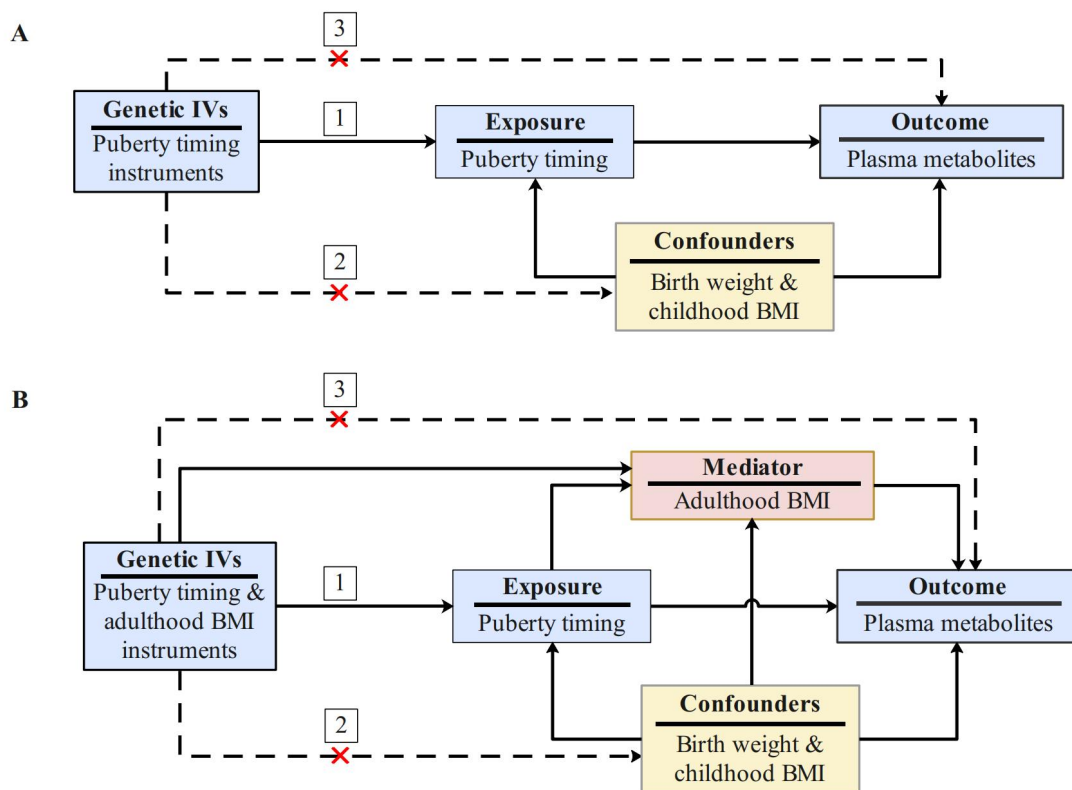

660

661 **Fig 2. The directed acyclic graphs of the Mendelian randomization study.** The figures  
 662 depict directed acyclic graphs for univariable Mendelian randomization (MR) and mediation  
 663 MR analysis in panel A and panel B respectively. The dashed lines represent potential  
 664 horizontal pleiotropy or direct causal effects between variables, which would violate the MR  
 665 assumption. MR approach is based on three assumptions: (1) the IVs (instrument variables)  
 666 are strongly associated with the exposure (e.g., puberty timing); (2) the genetic IVs are not  
 667 associated with any confounders (e.g., birth weight and childhood BMI (body mass index));  
 668 (3) the genetic IVs should influence the outcome (e.g., a metabolite) through the exposure  
 669 independently instead of through other pathways. The primary analysis was performed,  
 670 wherein SNPs that exhibited genetic associations with puberty timing were selected as IVs.  
 671 To minimize the risk of bias due to horizontal pleiotropy, a secondary analysis was conducted  
 672 wherein SNPs that exhibited genetic associations with birth weight and/or childhood BMI

673 were excluded.

674



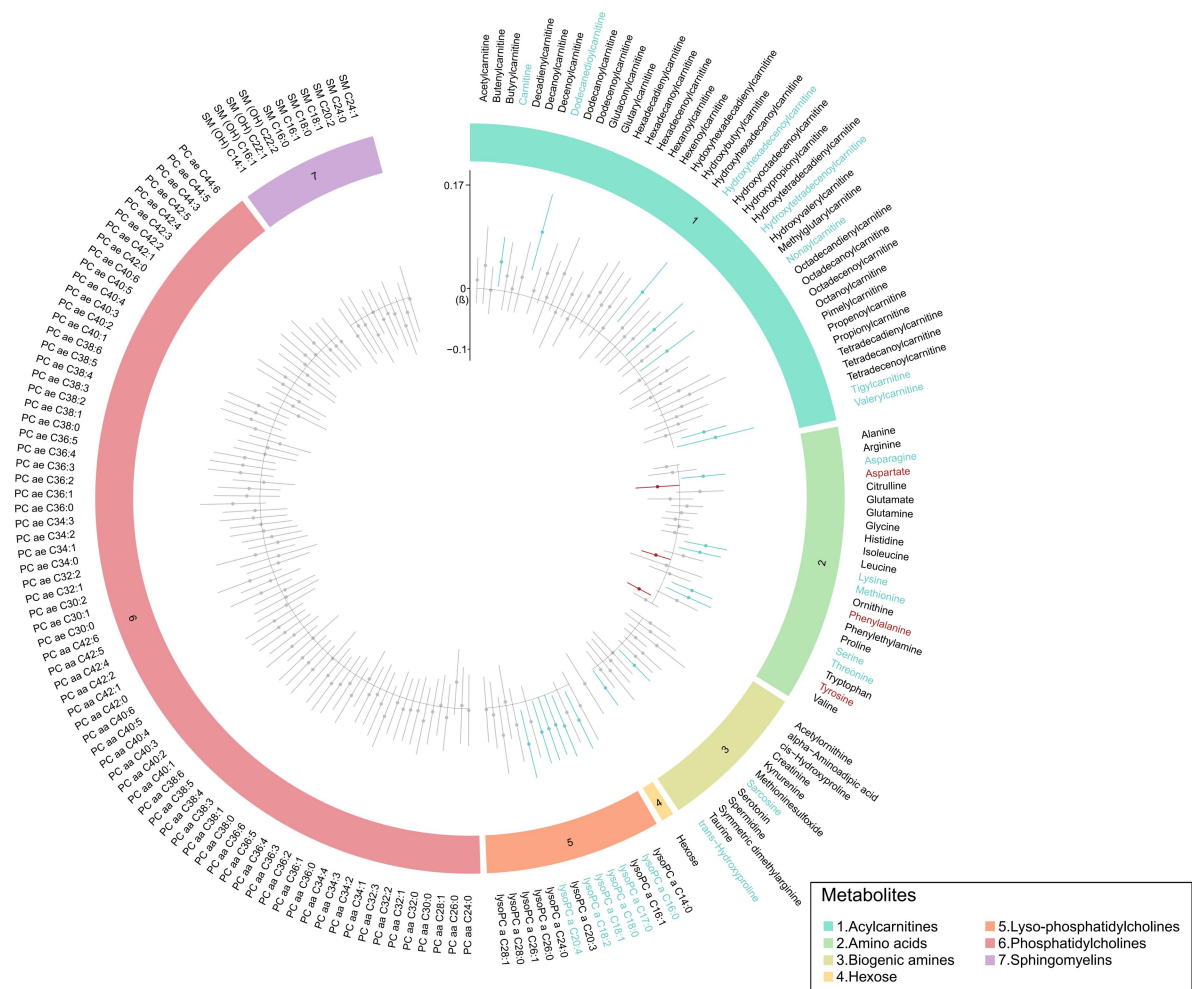

675

676 **Fig 3. Circos plot depicting the causal effect estimates of puberty timing on all 174**  
 677 **plasma metabolites.** The legend located at the lower section of the figure provides a visual  
 678 representation of distinct subclasses of plasma metabolites. The presence of metabolites  
 679 highlighted with the color blue indicates a positive causal effect of puberty timing on the  
 680 concentration of plasma metabolites. Specifically, each year later in puberty timing is  
 681 associated with higher levels of metabolites. In contrast, the identification of metabolites  
 682 highlighted with the color red suggests a negative causal effect of puberty timing on the  
 683 concentration of plasma metabolites, that is each year later in puberty timing is associated  
 684 with lower levels of metabolites. The presence of metabolites that had been designated as  
 685 black indicates that there is insufficient evidence to establish a causal relationship. The

686 evidence indicates a causal effect of puberty timing on 23 plasma metabolites. Error bars  
687 represent 95% confidence intervals. All statistical tests were two-sided.

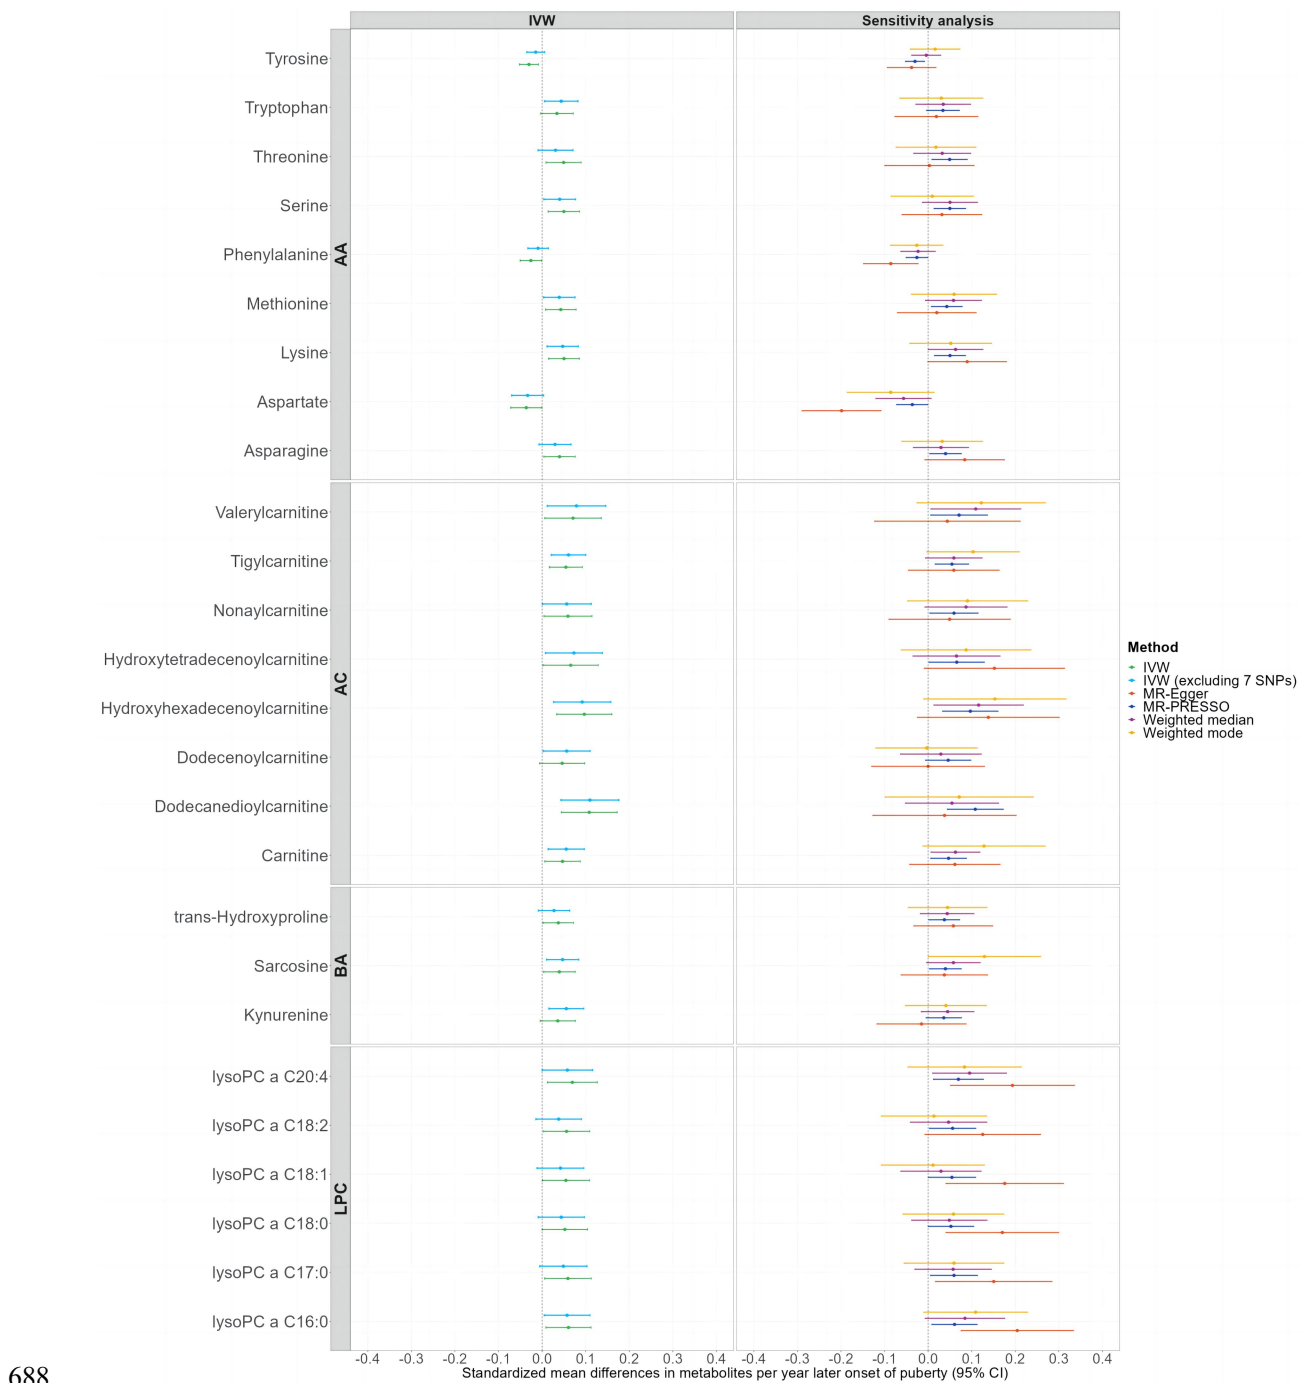

688

689 **Fig 4. Forest plots showing the causal effect estimates of puberty timing on plasma**  
 690 **metabolites.** The legend located on the right side of the forest plot indicates different analysis  
 691 approaches. Plasma metabolites reaching nominal significance ( $P < 0.05$ ) were shown  
 692 according to the results of IVW (inverse-variance weighted). The results presented on the left

693 side of the plot were analyzed using the IVW approach. The colors represent green, using the  
694 IVW method to estimate the effect size of puberty timing on plasma metabolites; blue; using  
695 the IVW method, but excluding 7 genetic instruments genetically related to birth weight  
696 and/or childhood BMI (body mass index). The results presented on the right were derived  
697 from four distinct sensitivity analyses. The sensitivity analysis findings indicate that the  
698 results of the primary analysis are largely robust. Error bars represent 95% confidence  
699 intervals. All statistical tests were two-sided. The metabolites were divided according to  
700 different subclasses. AA amino acids; AC acylcarnitines; BA biogenic amines; LPC  
701 lysophosphatidylcholines.

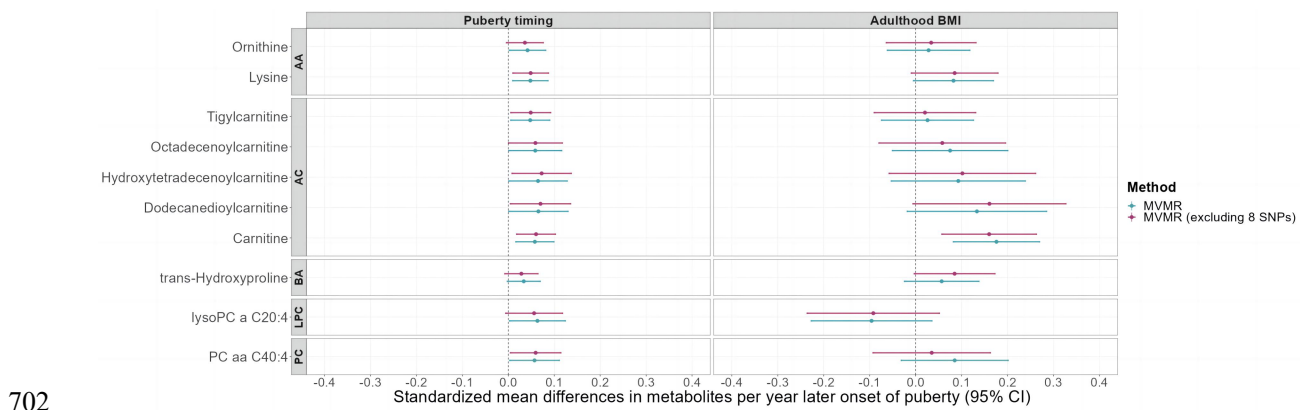

702

703 **Fig 5. Forest plots comparing the effect estimates of puberty timing and adulthood BMI**

704 **on plasma metabolites in MVMR analyses.** The legend located on the right side of the

705 forest indicates the distinct analysis. Plasma metabolites reaching nominal significance ( $P <$

706 0.05) in puberty timing were shown according to the results of the MVMR (multivariable

707 Mendelian randomization) approach. The colors represent blue, using the MVMR method to

708 estimate the effect size of puberty timing or adulthood BMI on plasma metabolites; purple;

709 using the MVMR method, but excluding 8 genetic instruments associated with birth weight

710 and/or childhood BMI (body mass index). The results on the left show the effect size of

711 puberty timing on each plasma metabolite, whereas the results on the right present the effect

712 size of adulthood BMI on each plasma metabolite. Error bars represent 95% confidence

713 intervals. All statistical tests were two-sided. The metabolites were also divided according to

714 different subclasses. AA amino acids; AC acylcarnitines; BA biogenic amines; LPC

715 lysophosphatidylcholines; PC phosphatidylcholines.

716

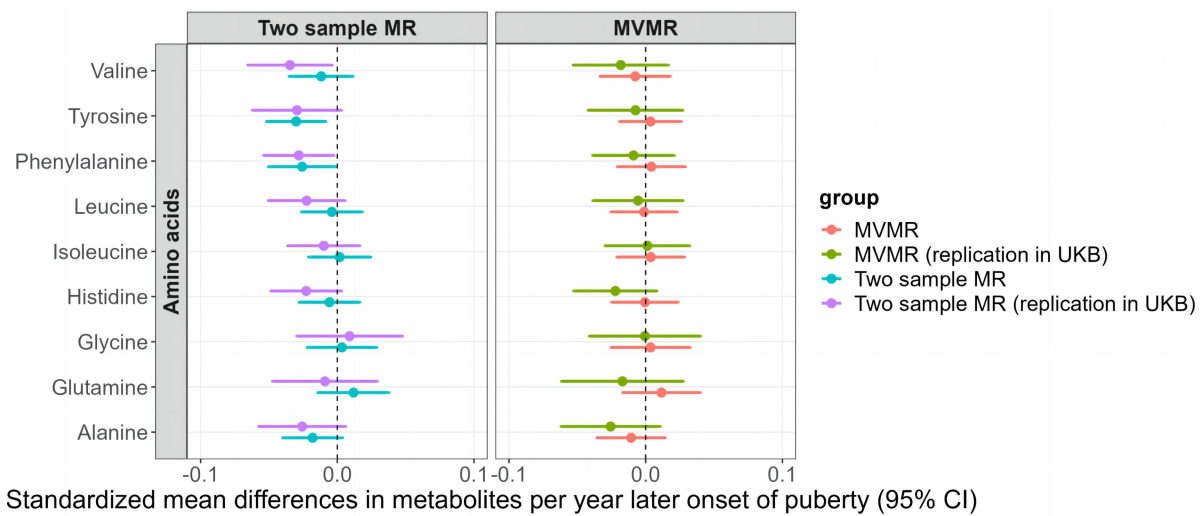

717

718 **Fig 6. Forest plots comparing the effect estimates of puberty timing on nine amino acids**

719 **in replication analyses.** The legend located on the right side of the forest plot indicates

720 different analysis methods. The results of two-sample MR (Mendelian randomization) and

721 MVMR (multivariable Mendelian randomization) represented the total (blue) and direct

722 impact (orange) of puberty timing on plasma metabolites, respectively. To inspect the

723 robustness of our two-sample MR and MVMR analysis results (purple and green), we

724 estimated the causal relationship of puberty timing on nine identified amino acids using data

725 from the UKB (UK Biobank). Our findings in the primary MR analysis were further

726 supported by the findings from external replication analysis in the UKB. Error bars represent

727 95% confidence intervals. All statistical tests were two-sided.
